# Supplementary material
Source: Springer Nature journal article supplement (https://www.springermedizin.de/resource/supplementary/12906_2008_209_MOESM5_ESM.pdf/9524282)
Supplement: MOESM5 [file 9524282]

**Table 3** Glucose Utilization (M) and Insulin Sensitivity (M/I) measured by the Hyperinsulinemic, Euglycemic Clamp in Healthy Volunteers at Baseline, after 3 days of IDV, and after Co-administration of IDV and AG (1 gram every 8 hours) for 14 days

| Subject   | M<br>(mg/kg FFM/min) |           |          | M/I<br>(mg/kg FFM/min per $\mu$ U/ml of insulin) |           |          |
|-----------|----------------------|-----------|----------|--------------------------------------------------|-----------|----------|
|           | Baseline             | IDV Alone | IDV + AG | Baseline                                         | IDV Alone | IDV + AG |
| <b>4</b>  | 8.25                 | 5.69      | 5.79     | 0.121                                            | 0.072     | 0.072    |
| <b>5</b>  | 8.46                 | 8.20      | 10.35    | 0.135                                            | 0.138     | 0.193    |
| <b>6</b>  | 4.58                 | 3.93      | 4.01     | 0.055                                            | 0.049     | 0.059    |
| <b>7</b>  | 11.52                | 7.14      | 7.82     | 0.173                                            | 0.141     | 0.134    |
| <b>8</b>  | 8.88                 | 9.02      | 7.29     | 0.132                                            | 0.155     | 0.118    |
| <b>9</b>  | 4.10                 | 2.74      | -        | 0.062                                            | 0.037     | -        |
| <b>10</b> | 10.14                | 9.54      | 9.94     | 0.119                                            | 0.126     | 0.123    |
| <b>11</b> | 9.60                 | 8.62      | 5.93     | 0.157                                            | 0.115     | 0.107    |
| <b>12</b> | 6.19                 | 4.24      | 3.51     | 0.078                                            | 0.062     | 0.042    |
| <b>13</b> | 8.62                 | 7.82      | 7.66     | 0.137                                            | 0.123     | 0.113    |
| <b>14</b> | 4.60                 | 2.62      | 2.37     | 0.068                                            | 0.038     | 0.030    |
